# Supplementary material
Source: publisher figshare collection journal article supplement (https://tandf.figshare.com/ndownloader/files/7301906)
Supplement: Supplementary file 1 [file 7301906]

## Sheet: Sheet1
		NASS CDL (Resampled)
		Corn	Cotton	Sorghum	Soybeans	Spring Wheat	Winter Wheat	Alfalfa	Other Hay/Non-Alfalfa	Fallow/Idle Cropland	Other	Total	User's Accuracy (%)
Modeled Crop Classification	Corn	2785193	10969	25940	847183	12552	55246	19597	5606	21158	385079	4168523	66.8149
	Cotton	10147	346317	15772	19653	151	21717	2124	127	5920	44813	466741	74.199
	Sorghum	12016	11612	115515	6195	152	21209	475	64	11926	18298	197462	58.4999
	Soybeans	686246	29890	6207	2075366	29714	27616	4817	2592	7449	338298	3208195	64.6895
	Spring Wheat	11860	79	261	31699	407102	16338	2001	3217	14847	129358	616762	66.0063
	Winter Wheat	40904	17020	39980	18981	21359	1222419	15456	7124	130127	190662	1704032	71.7369
	Alfalfa	12942	2893	902	1465	2378	11850	184578	15680	4014	52458	289160	63.8325
	Other Hay/Non-Alfalfa	4414	13	52	833	1225	1766	8880	182918	909	37186	238196	76.7931
	Fallow/Idle Cropland	13767	3170	11083	5055	18733	102546	2946	1697	452918	96295	708210	63.9525
	Other	1912124	195795	124697	1709901	404217	661809	374465	1272080	410262	12806478	19871828	64.4454
	Total	5489613	617758	340409	4716331	897583	2142516	615339	1491105	1059530	14098925	31469109
	Producer's Accuracy (%)	50.7357	56.0603	33.9342	44.0038	45.3554	57.0553	29.9961	12.2673	42.7471	90.833		65.3937
